# Supplementary material
Source: PubMed Central journal article supplement (PMC6921248)

## Supporting Information

### Effect of Particle Size and Electronic Percolation on Low Temperature Performance in Lithium Titanate based Batteries

Joong Sun Park<sup>a,\*</sup>, Carine L. Margez<sup>a</sup>, Thomas A. Greszler<sup>a</sup>

<sup>a</sup> SAFT America, Inc., Cockeysville, MD 21030

\*Corresponding author: [joongsun.park@saftamerica.com](mailto:joongsun.park@saftamerica.com)

KEYWORDS:  $\text{Li}_4\text{Ti}_5\text{O}_{12}$ ,  $\text{LiMn}_2\text{O}_4$ , Cold crank, Low temperature

Table S1: Fitting summary

| <b><math>R_{ct}</math> (Ohm)</b> | <b>25°C</b> | <b>0°C</b> | <b>-30°C</b> |
|----------------------------------|-------------|------------|--------------|
| LTO A 3wt% Carbon                | 0.256       | 1.574      | 28.95        |
| LTO B 3wt% Carbon                | 0.17        | 0.635      | 8.194        |
| LTO A 5wt% Carbon                | 0.193       | 1.157      | 19.68        |

Figure S1. Cold crank performance (Voltage-time plot) of LTO A 3% CB, LTO B 3% CB, LTO A 5% CB (a), (b) at -30°C and (c), (d) 25°C

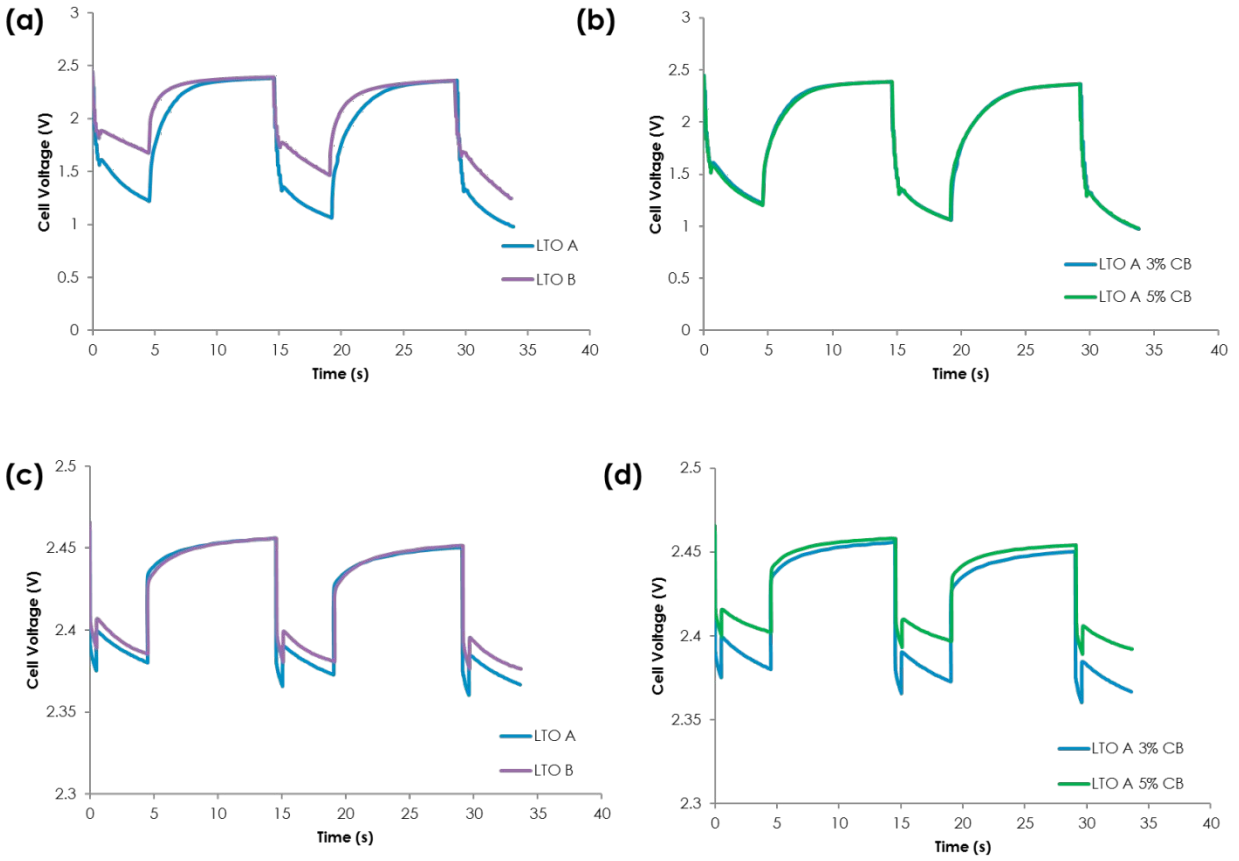

Figure S2. Nyquist plot of LTO A 3% CB, LTO B 3% CB, and LTO A 5% CB at -30°C, 0°C, and 25°C

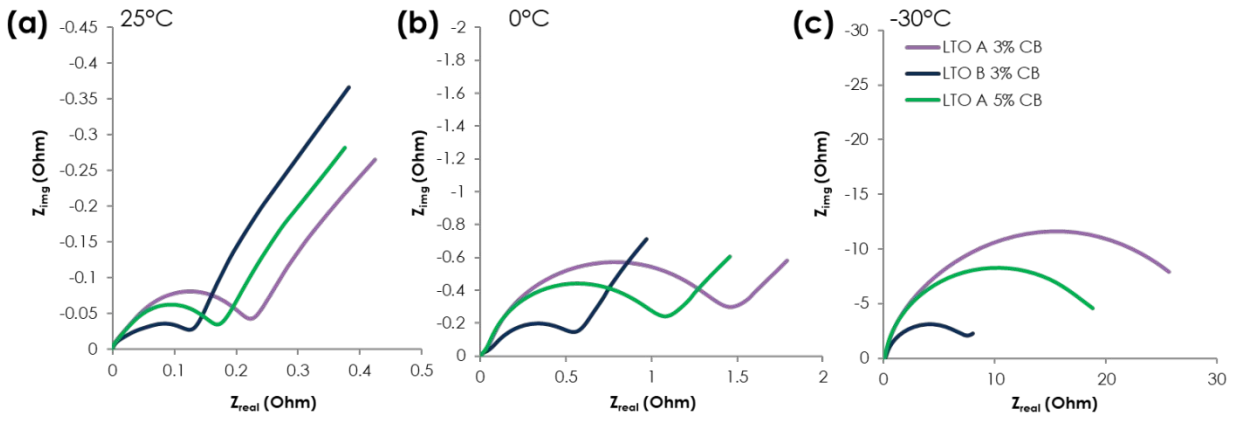

Figure S3. Electrodes and single layer pouch cell used in this study

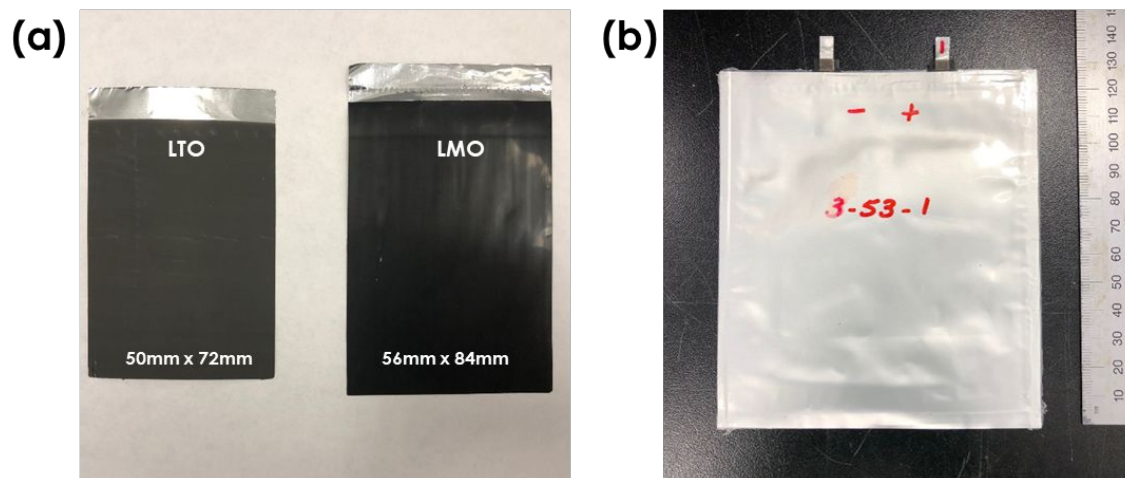

Supplement: ao9b02393_si_001.pdf [file ao9b02393_si_001.pdf]
